# Supplementary material for: Differential miRNA expression profiling reveals miR-205-3p to be a potential radiosensitizer for low- dose ionizing radiation in DLD-1 cells
Source: PubMed Central journal article supplement (PMC5995186; doi:10.18632/oncotarget.25405), 2018-05-29
Supplement: oncotarget-09-26387-s001.pdf [file oncotarget-09-26387-s001.pdf]

## Differential miRNA expression profiling reveals miR-205-3p to be a potential radiosensitizer for low- dose ionizing radiation in DLD-1 cells

### SUPPLEMENTARY MATERIALS

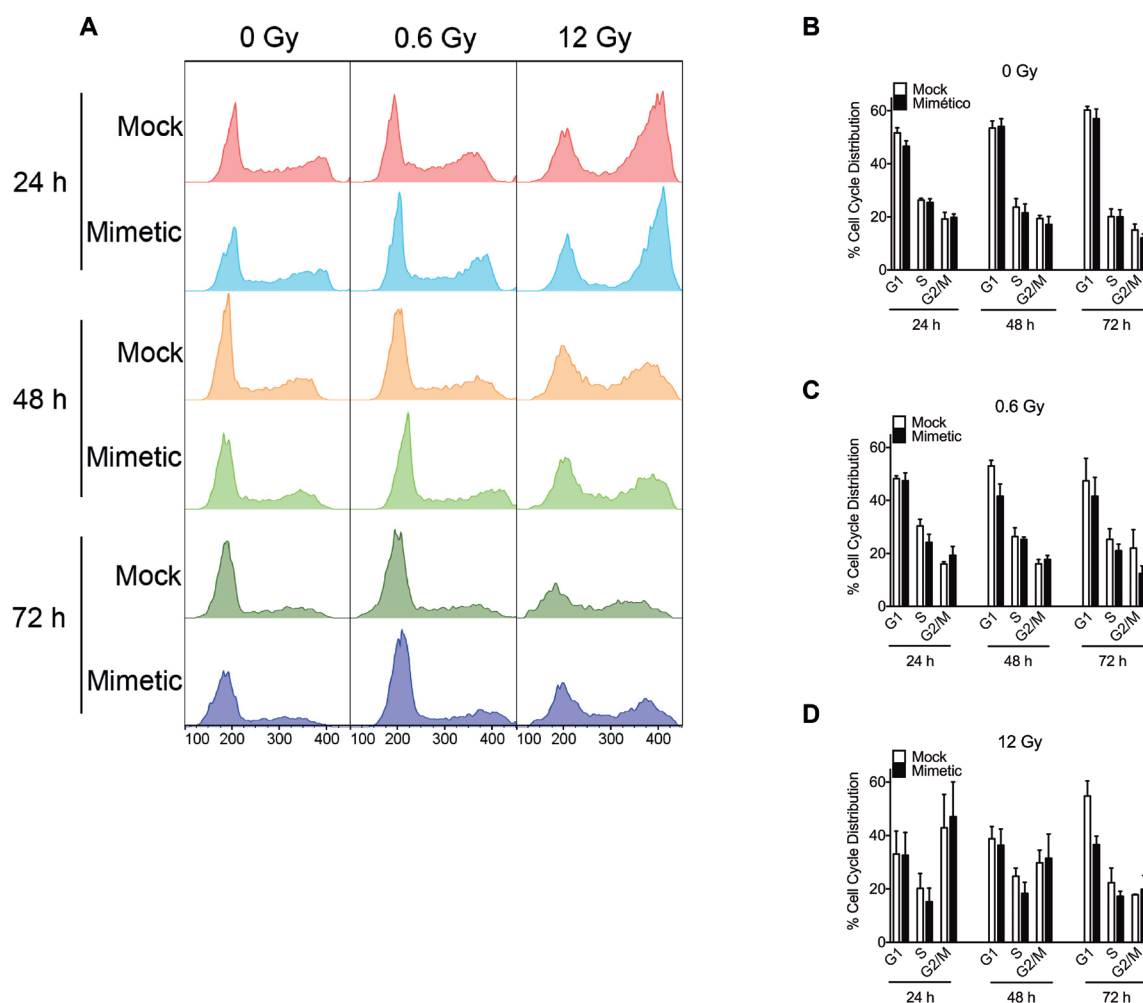

**Supplementary Figure 1: Cell cycle distribution of DLD-1 cells at different times post irradiation in cells transfected with a miR-205-3p mimic or mock-transfected. Results are expressed as a percentage of cell cycle distribution at each time.**

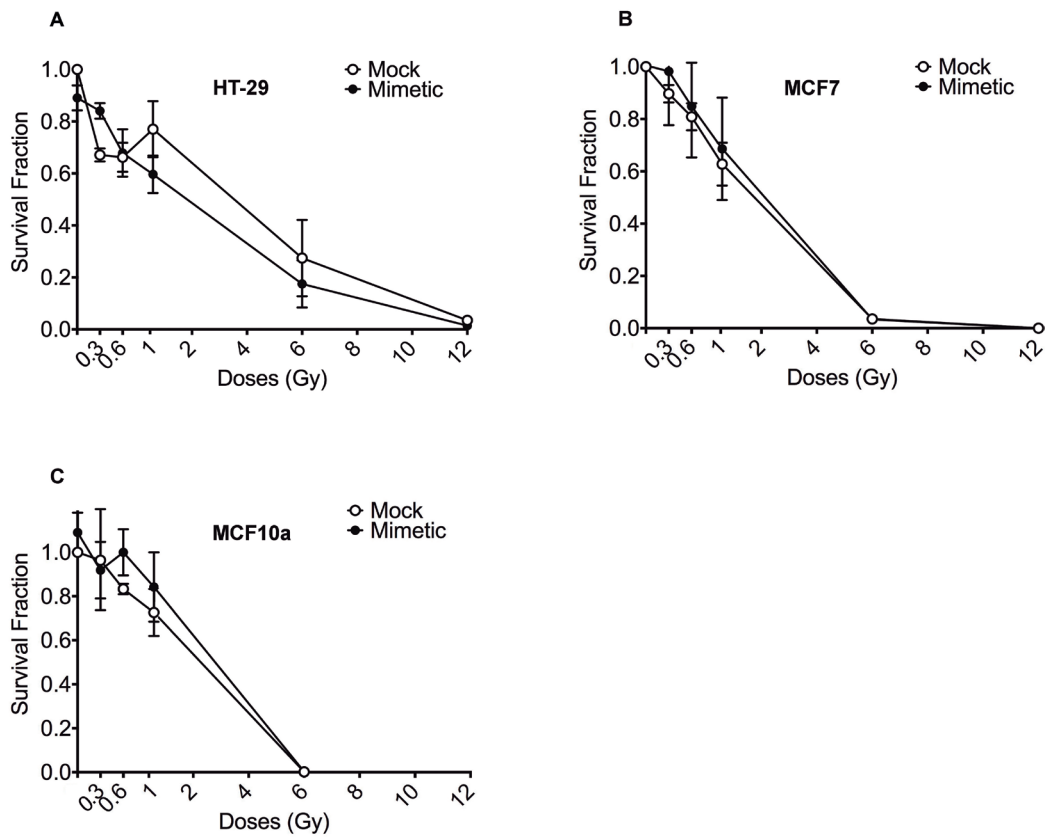

**Supplementary Figure 2:** Effect of miR-205-3p on survival of (A) HT29, (B) MCF7 and (C) MCF10a cells, evaluated by clonogenic assay at 10–14 days post irradiation. Colonies  $\geq 200 \mu\text{m}$  ( $\approx 50$  cells) were counted using *Gen5* Software. Survival fraction was calculated as described in methods.

**Supplementary Table 1: List of miRNAs evaluated by array-PCR**

| miRNA name      | Sequence                | miRNA name      | Sequence                |
|-----------------|-------------------------|-----------------|-------------------------|
| hsa-miR-106a-5p | AAAAGUGCUUACAGUGCAGGUAG | hsa-miR-218-5p  | UUGUGCUUGAUCUAACCAUGU   |
| hsa-miR-141-3p  | UAACACUGUCUGGUAAGAUGG   | hsa-miR-26a-5p  | UUCAAGUAAUCCAGGAUAGGCU  |
| hsa-miR-183-5p  | UAUGGCACUGGUAGAAUUCACU  | hsa-miR-26b-5p  | UUCAAGUAAUUCAGGAUAGGU   |
| hsa-miR-210-3p  | CUGUGCGUGUGACAGCGGCUGA  | hsa-miR-27a-3p  | UUCACAGUGGCUAAGUUCGCG   |
| hsa-miR-214-3p  | ACAGCAGGCACAGACAGGCAGU  | hsa-miR-30c-5p  | UGUAAACAUCUACACUCUCAGC  |
| hsa-miR-338-3p  | UCCAGCAUCAGUGAUUUUGUUG  | hsa-miR-30e-5p  | UGUAAACAUCUUGACUGGAAG   |
| hsa-miR-378a-3p | ACUGGACUUGGAGUCAGAAGGC  | hsa-miR-31-5p   | AGGCAAGAUGCUGGCAUAGCU   |
| hsa-miR-98-5p   | UGAGGUAGUAAAGUUGUAUUGUU | hsa-miR-365a-3p | UAAUGCCCCUAAAAUCCUUAU   |
| hsa-miR-133a-3p | UUUGGUCCCCUUAACCAGCUG   | hsa-miR-409-3p  | GAAUGUUGCUCGGUGAACCCCU  |
| hsa-miR-181a-5p | AACAUAACGCUGUCGGUGAGU   | hsa-miR-449a    | UGGCAGUGUAUUGUUGCUGGU   |
| hsa-miR-21-5p   | UAGCUUAUCAGACUGAUGUUGA  | hsa-miR-708-5p  | AAGGAGCUUACAAUCUAGCUGGG |
| hsa-miR-25-3p   | CAUUGCACUUGUCUCGGUCUGA  | hsa-miR-101-3p  | UACAGUACUGUGAAACUGAA    |
| hsa-miR-30a-5p  | UGUAAACAUCUCGACUGGAAG   | hsa-miR-29b-3p  | UAGCACCAUUUGAAAUCAGUGUU |
| hsa-miR-30b-5p  | UGUAAACAUCUACACUCAGCU   | hsa-miR-149-3p  | AGGGAGGGACGGGGCUGUGC    |
| hsa-miR-125a-5p | UCCCUGAGACCCUUAACCUGUGA | hsa-miR-153-3p  | UUGCAUAGUCACAAAAGUGAUC  |
| hsa-miR-125b-5p | UCCCUGAGACCCUAAUUGUGA   | hsa-miR-15b-5p  | UAGCAGCACAUCAUGUUUACA   |
| hsa-miR-20a-5p  | UAAAGUGCUUAUAGUGCAGGUAG | hsa-miR-16-5p   | UAGCAGCACGUAAAUAUUGGCG  |
| hsa-miR-622     | ACAGUCUGCUGAGGUUGGAGC   | hsa-miR-181b-5p | AACAUAUUGCUGUCGGUGGGU   |
| hsa-miR-30d-5p  | UGUAAACAUCCCGACUGGAAG   | hsa-miR-195-5p  | UAGCAGCACAGAAAUAUUGGC   |
| hsa-let-7c-5p   | UGAGGUAGUAGGUUGUAUGGUU  | hsa-miR-203a    | GUGAAAUGUUUAGGACCACUAG  |
| hsa-let-7g-5p   | UGAGGUAGUAGUUUGUACAGUU  | hsa-miR-204-5p  | UUCCCUUUGUCAUCCUUGCCU   |
| hsa-miR-1       | UGGAAUGUAAAGAAGUAUGUAU  | hsa-miR-29a-3p  | UAGCACCAUCUGAAAUCGGUUA  |
| hsa-miR-101-3p  | UACAGUACUGUGAAACUGAA    | hsa-miR-29c-3p  | UAGCACCAUUUGAAAUCGGUUA  |
| hsa-miR-122-5p  | UGGAGUGUGACAAUGGUGUUUG  | hsa-miR-34a-5p  | UGGCAGUGUCUUAGCUGGUUGU  |
| hsa-miR-133b    | UUUGGUCCCCUUAACCAGCUA   | hsa-miR-497-5p  | CAGCAGCACACUGUGGUUUGU   |
| hsa-miR-193b-5p | CGGGUUUUGAGGGCGAGAUGA   | hsa-miR-512-5p  | CACUCAGCCUUGAGGGCACUUUC |
| hsa-miR-194-5p  | UGUAACAGCAACUCCAUGUGGA  | hsa-miR-134-5p  | UGUGACUGGUUGACCAGAGGGG  |
| hsa-miR-204-5p  | UUCCCUUUGUCAUCCUUGCCU   | hsa-miR-221-3p  | AGCUACAUUGUCUGCUGGGUUUC |
| hsa-miR-491-5p  | AGUGGGGAACCCUCCAUGAGG   | hsa-miR-423-5p  | UGAGGGGCAGAGAGCGAGACUUU |
| hsa-miR-512-5p  | CACUCAGCCUUGAGGGCACUUUC | hsa-miR-32-5p   | UAUUGCACAUACUAAGUUGCA   |
| hsa-miR-542-3p  | UGUGACAGAUUGAAACUGAAA   | hsa-miR-148b-5p | AAGUUCUGUUUAACACUCAGGC  |
| hsa-miR-9-5p    | UCUUUGGUUAUCUAGCUGUAUGA | hsa-miR-148b-5p | AAGUUCUGUUUAACACUCAGGC  |
| hsa-miR-146a-5p | UGAGAACUGAAUCCAUGGGUU   | hsa-miR-124-3p  | UAAGGCACGCGGUGAAUGCC    |
| hsa-miR-181c-5p | AACAUAACCCUGUCGGUGAGU   | hsa-miR-18a-5p  | UAAGGUGCAUCUAGUGCAGAUAG |
| hsa-miR-181d-5p | AACAUAUUGUUGUCGGUGGGU   | hsa-miR-196b-5p | UAGGUAGUUCCUGUUGUUGGG   |
| hsa-miR-92a-3p  | UAUUGCACUUGCCCGGCCUGU   | hsa-let-7a-5p   | UGAGGUAGUAGGUUGUAUAGUU  |
| hsa-miR-128-3p  | UCACAGUGAACCGGUCUCUUU   | hsa-miR-145-5p  | GUCCAGUUUCCCAGGAAUCCCU  |
| hsa-miR-143-3p  | UGAGAUGAAGCACUGUAGCUC   | hsa-miR-15a-5p  | UAGCAGCACAUAAUGGUUUGUG  |
| hsa-miR-144-3p  | UACAGUAUAGAUGAUGUACU    | hsa-miR-17-5p   | CAAAGUGCUUACAGUGCAGGUAG |
| hsa-miR-200c-3p | UAAUACUGCCGGUAAUGAUGGA  | hsa-miR-185-5p  | UGGAGAGAAAGGCAGUCCUGA   |
| hsa-miR-205-5p  | UCCUUAUUCACCGGAGUCUG    | hsa-miR-192-5p  | CUGACCUAUGAAUUGACAGCC   |
| hsa-miR-206     | UGGAAUGUAAGGAAGUGUGUGG  | hsa-miR-451a    | AAACCGUUACCAUACUGAGUU   |
| hsa-miR-212-3p  | UAACAGUCUCCAGUCACGGCC   | hsa-miR-33a-5p  | GUGCAUUGUAGUUGCAUUGCA   |
| hsa-miR-423-5p  | UGAGGGGCAGAGAGCGAGACUUU | hsa-miR-191-5p  | CAACGAAUCCAAAAGCAGCUG   |
| hsa-miR-520d-5p | CUACAAAGGGAAGCCUUUC     |                 |                         |

**Supplementary Table 2: List of primers used in RT-qPCR**

| <b>Target</b>  | <b>Forward primer</b> | <b>Reverse primer</b>  |
|----------------|-----------------------|------------------------|
| VEGF-A         | ATGCGGATCAAACCTCACCA  | ACACGTCTGCGGATCTTGTA   |
| PKC $\epsilon$ | ACTGGCAAGTTTGCTGGGAA  | CAACGAACACGCAAGCCTTT   |
| MMP9           | AGAGCTTGTCCTCGGTAGT   | GGCAATGCTGATGGGAAACCCT |
| NOD2           | TTGTGAGCAGGCTGTGAGTT  | TGGCAAAGTAGGCTTGGGA    |
| HPRT           | TGCTTCCTTGGTCAGGCAGTA | CAACACTTCGTGGGGTCCTTTT |
